# Supplementary material for: Context-Aware Saliency Guided Radiomics: Application to Prediction of Outcome and HPV-Status from Multi-Center PET/CT Images of Head and Neck Cancer
Source: MDPI journal article supplement (doi:10.3390/cancers14071674), 2022-03-25
Supplement: s1 [file s1]

# Supplementary Materials: Context-Aware Saliency Guided Radiomics: Application to Prediction of Outcome and HPV-Status from Multi-Center PET/CT Images of Head and Neck Cancer

Wenbing Lv, Hui Xu, Xu Han, Hao Zhang, Jianhua Ma, Arman Rahmim and Lijun Lu

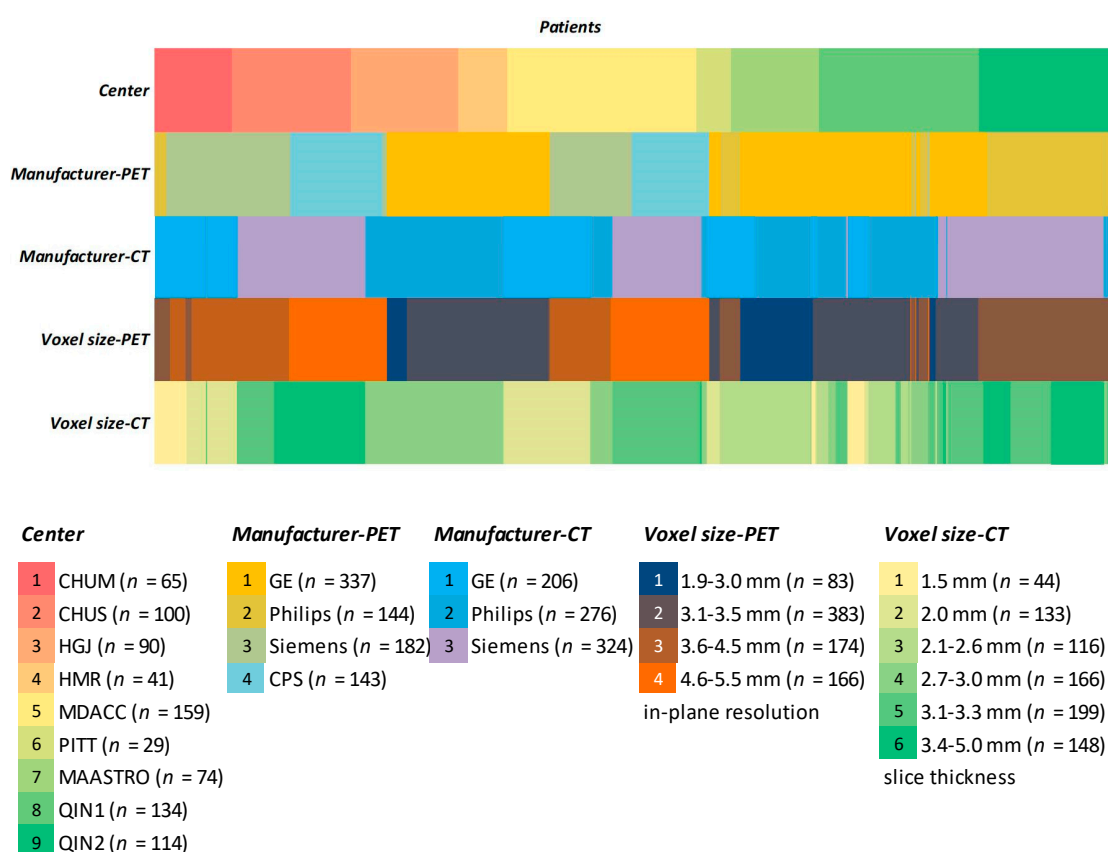

**Figure S1.** Batches divided by centers, manufacturers and voxel-size. In total, 9, 4, 3, 4, and 6 batches were present for different centers, PET manufacturers, CT manufacturers, PET voxel sizes and CT voxel sizes.

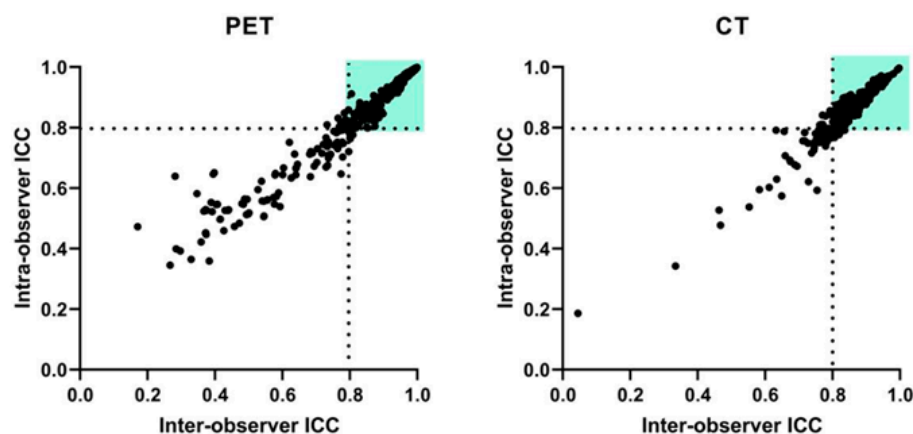

**Figure S2.** Intra- and inter-observer ICCs of PET and CT features. There were 322/497 PET features and 406/497 CT features with both inter- and intra-observer ICCs>0.8 that remained reproducible for segmentation (green region).

**Table S1.** C-index (95% confidence interval) of each model (Origin, SalMap, highSal, lowSal, SalxImg, and FusedImg) in training and validation cohorts for RFS, MFS, OS, and DFS predictions.

| Model    | Training C-index       |                        |                        |                        | Validation C-index     |                        |                        |                        |
|----------|------------------------|------------------------|------------------------|------------------------|------------------------|------------------------|------------------------|------------------------|
|          | RFS                    | MFS                    | OS                     | DFS                    | RFS                    | MFS                    | OS                     | DFS                    |
| Origin   | 0.677<br>(0.633–0.726) | 0.675<br>(0.623–0.726) | 0.644<br>(0.594–0.695) | 0.635<br>(0.592–0.680) | 0.730<br>(0.652–0.824) | 0.719<br>(0.628–0.812) | 0.720<br>(0.627–0.814) | 0.730<br>(0.653–0.824) |
| SalMap   | 0.690<br>(0.646–0.735) | 0.685<br>(0.633–0.736) | 0.661<br>(0.612–0.710) | 0.655<br>(0.614–0.696) | 0.664<br>(0.584–0.744) | 0.712<br>(0.617–0.808) | 0.716<br>(0.619–0.814) | 0.664<br>(0.586–0.744) |
| highSal  | 0.660<br>(0.614–0.706) | 0.638<br>(0.582–0.690) | 0.661<br>(0.582–0.680) | 0.655<br>(0.585–0.665) | 0.664<br>(0.579–0.769) | 0.641<br>(0.537–0.751) | 0.646<br>(0.541–0.757) | 0.664<br>(0.578–0.766) |
| lowSal   | 0.632<br>(0.579–0.681) | 0.661<br>(0.606–0.716) | 0.627<br>(0.574–0.681) | 0.627<br>(0.581–0.670) | 0.701<br>(0.622–0.800) | 0.700<br>(0.610–0.800) | 0.703<br>(0.612–0.803) | 0.702<br>(0.624–0.801) |
| SalxImg  | 0.592<br>(0.537–0.640) | 0.660<br>(0.606–0.706) | 0.645<br>(0.588–0.694) | 0.615<br>(0.570–0.653) | 0.705<br>(0.623–0.784) | 0.760<br>(0.664–0.859) | 0.755<br>(0.657–0.857) | 0.708<br>(0.628–0.786) |
| FusedImg | 0.604<br>(0.557–0.655) | 0.627<br>(0.567–0.680) | 0.610<br>(0.554–0.663) | 0.595<br>(0.552–0.639) | 0.696<br>(0.617–0.778) | 0.726<br>(0.628–0.825) | 0.726<br>(0.625–0.827) | 0.697<br>(0.619–0.778) |

**Table S2.** C-index (95% confidence interval) of Rad\_Ocm, Rad\_HPVP, and Rad\_Ocm\_HPVP for outcome prediction in 123 OPC patients from testing cohort, AUC (95% confidence interval) for HPV prediction in 100 OPC patients from training cohort, and 60 OPC patients from external testing cohort.

| Model    | Rad_Ocm |         |         |         | Rad_HPVP |         |         |         | Rad_Ocm_HPVP |         |         |         |         |         |
|----------|---------|---------|---------|---------|----------|---------|---------|---------|--------------|---------|---------|---------|---------|---------|
|          | C-index |         |         |         | AUC      | AUC     | C-index |         |              |         | C-index |         |         |         |
|          | RFS     | MFS     | OS      | DFS     | Training | Testing | RFS     | MFS     | OS           | DFS     | RFS     | MFS     | OS      | DFS     |
| Origin   | 0.502   | 0.596   | 0.592   | 0.564   | 0.706    | 0.484   | 0.588   | 0.633   | 0.622        | 0.615   | 0.552   | 0.616   | 0.611   | 0.598   |
|          | (0.309– | (0.405– | (0.458– | (0.444– | (0.580–  | (0.278– | (0.417– | (0.449– | (0.476–      | (0.494– | (0.335– | (0.417– | (0.471– | (0.467– |
|          | 0.667)  | 0.780)  | 0.717)  | 0.676)  | 0.820)   | 0.661)  | 0.759)  | 0.813)  | 0.763)       | 0.740)  | 0.692)  | 0.795)  | 0.728)  | 0.700)  |
| SalMap   | 0.592   | 0.668   | 0.629   | 0.613   | 0.784    | 0.620   | 0.554   | 0.648   | 0.564        | 0.544   | 0.596   | 0.683   | 0.603   | 0.584   |
|          | (0.431– | (0.505– | (0.503– | (0.504– | (0.681–  | (0.480– | (0.391– | (0.431– | (0.431–      | (0.427– | (0.435– | (0.498– | (0.489– | (0.485– |
|          | 0.733)  | 0.822)  | 0.750)  | 0.719)  | 0.882)   | 0.752)  | 0.719)  | 0.832)  | 0.677)       | 0.658)  | 0.739)  | 0.867)  | 0.738)  | 0.709)  |
| highSal  | 0.545   | 0.524   | 0.509   | 0.523   | 0.654    | 0.670   | 0.537   | 0.566   | 0.578        | 0.575   | 0.552   | 0.588   | 0.582   | 0.570   |
|          | (0.375– | (0.335– | (0.367– | (0.403– | (0.521–  | (0.522– | (0.395– | (0.395– | (0.456–      | (0.472– | (0.393– | (0.375– | (0.426– | (0.446– |
|          | 0.686)  | 0.687)  | 0.624)  | 0.627)  | 0.777)   | 0.820)  | 0.684)  | 0.766)  | 0.696)       | 0.683)  | 0.713)  | 0.759)  | 0.666)  | 0.660)  |
| lowSal   | 0.594   | 0.656   | 0.562   | 0.573   | 0.762    | 0.555   | 0.582   | 0.620   | 0.597        | 0.577   | 0.607   | 0.683   | 0.607   | 0.594   |
|          | (0.411– | (0.472– | (0.426– | (0.448– | (0.634–  | (0.408– | (0.397– | (0.437– | (0.473–      | (0.453– | (0.420– | (0.544– | (0.474– | (0.471– |
|          | 0.762)  | 0.836)  | 0.683)  | 0.691)  | 0.882)   | 0.695)  | 0.749)  | 0.800)  | 0.707)       | 0.695)  | 0.794)  | 0.839)  | 0.715)  | 0.718)  |
| SalxImg  | 0.546   | 0.660   | 0.565   | 0.567   | 0.775    | 0.433   | 0.641   | 0.440   | 0.498        | 0.512   | 0.605   | 0.544   | 0.534   | 0.539   |
|          | (0.397– | (0.492– | (0.433– | (0.464– | (0.677–  | (0.263– | (0.544– | (0.226– | (0.375–      | (0.408– | (0.441– | (0.397– | (0.410– | (0.434– |
|          | 0.683)  | 0.827)  | 0.679)  | 0.666)  | 0.883)   | 0.597)  | 0.749)  | 0.633)  | 0.615)       | 0.618)  | 0.717)  | 0.751)  | 0.657)  | 0.654)  |
| FusedImg | 0.603   | 0.638   | 0.671   | 0.651   | 0.702    | 0.653   | 0.565   | 0.687   | 0.627        | 0.615   | 0.616   | 0.683   | 0.702   | 0.684   |
|          | (0.460– | (0.485– | (0.553– | (0.546– | (0.570–  | (0.505– | (0.458– | (0.546– | (0.529–      | (0.533– | (0.491– | (0.544– | (0.599– | (0.589– |
|          | 0.737)  | 0.784)  | 0.781)  | 0.752)  | 0.831)   | 0.798)  | 0.695)  | 0.853)  | 0.738)       | 0.717)  | 0.731)  | 0.843)  | 0.807)  | 0.780)  |

**Table S3.** Features and corresponding coefficient used for Rad\_Ocm and Rad\_HP V generation in SalMap, SalxImg and FsedImg models. Model configuration (Config.) consists of modality (Clinical, CT, or PET) and harmonization method (e.g. voxel-size based or none).

| Model    | Config.                         | Features for Rad_Ocm     | Coeff. | Features for Rad_HP V     | Coeff. |
|----------|---------------------------------|--------------------------|--------|---------------------------|--------|
| SalMap   | Clin +<br>CT_None               | CT_dzm_ldhge_2_5D        | 0.076  | CT_loc_peak_loc           | −0.925 |
|          |                                 | CT_rlm_rl_entr_2D_comb   | 0.019  | CT_cm_corr_2_5D_comb      | 0.922  |
|          |                                 | CT_dzm_lde_2_5D          | 0.183  | CT_stat_max               | −0.214 |
|          |                                 | CT_cm_info_corr1_2D_comb | −0.314 | T-stage                   | −0.418 |
|          |                                 | T-stage                  | 0.156  | CT_cm_inv_diff_2_5D_avg   | −0.417 |
|          |                                 | CT_cm_sum_var_2D_avg     | 0.232  | CT_cm_clust_shade_3D_comb | −0.517 |
|          |                                 | CT_szm_zs_entr_2_5D      | −0.041 | intercept                 | 1.160  |
|          |                                 | CT_cm_info_corr2_2D_comb | −0.279 |                           |        |
| SalxImg  | PET +<br>CT_Voxel<br>size based |                          |        | PET_stat_median           | −0.385 |
|          |                                 |                          |        | PET_stat_cov              | 0.089  |
|          |                                 |                          |        | PET_ngl_hdhge_3D          | −0.380 |
|          |                                 | PET_szm_glnu_2_5D        | 0.115  | PET_cm_joint_max_2_5D_avg | 0.018  |
|          |                                 | CT_ih_min_grad           | −0.123 | PET_stat_skew             | 0.217  |
|          |                                 |                          |        | PET_morph_com             | 0.708  |
|          |                                 |                          |        | CT_cm_info_corr1_2_5D_avg | 0.417  |
|          |                                 |                          |        | intercept                 | 1.250  |
| FusedImg | PET +<br>CT_Voxel<br>size based |                          |        | cm_info_corr2_3D_avg      | 0.436  |
|          |                                 |                          |        | ngl_hdlge_2_5D            | −0.790 |
|          |                                 |                          |        | rlm_rl_entr_3D_avg        | 0.363  |
|          |                                 |                          |        | ngl_gl_var_2D             | −0.452 |
|          |                                 | ngl_glnu_2_5D            | 0.044  | morph_vol_dens_ombb       | 0.211  |
|          |                                 | szm_lzhge_3D             | 0.070  | morph_diam                | −0.148 |
|          |                                 | ngl_hdlge_2_5D           | 0.145  | mi_oq                     | −0.242 |
|          |                                 |                          |        | szm_sze_3D                | 0.182  |
|          |                                 |                          |        | loc_peak_glob             | −0.009 |
|          |                                 |                          |        | rlm_rl_entr_2D_comb       | −0.457 |
|          |                                 |                          |        | szm_lzlge_2D              | 0.738  |
|          |                                 |                          |        | intercept                 | 1.078  |
|          |                                 |                          |        |                           |        |
|          |                                 |                          |        |                           |        |
